# Supplementary material
Source: publisher site journal article supplement (https://www.dovepress.com/article/559258)
Supplement: Supplementary file 1 [file supplementary%20material.docx]

**Supplementary Methods**

Criteria that apply to all ARDS categories：

Risk factors and origin of edema: Precipitated by an acute predisposing risk factor such as pneumonia, non-pulmonary infection, trauma, transfusion, aspiration, or shock. Pulmonary edema is not exclusively or primarily attributable to cardiogenic pulmonary edema/fluid overload, and hypoxemia/gas exchange abnormalities are not primarily attributable to atelectasis. However, ARDS can be diagnosed in the presence of these conditions if a predisposing risk factor for ARDS is also present.

Timing: Acute onset or worsening of hypoxemic respiratory failure within 1week of the estimated onset of the predisposing risk factor or new or worsening respiratory symptoms.

Chest imaging: Bilateral opacities on chest radiograph and computed tomography, or bilateral B lines and/or consolidations by ultrasound, not fully explained by effusions, atelectasis, or nodules/masses.

**Supplementary Tables**

**Table S1** Parameter Estimates of the GBTM for HBP in ARDS

| **Group** | **Parameter** | **Estimate** | **Standard Error** | **t** | ***P* value** |
| --- | --- | --- | --- | --- | --- |
| 1 | Intercept | 44.9881 | 4.8623 | 9.272 | < 0.0001 |
|  | Linear | 19.5343 | 5.5287 | 3.533 | 0.0004 |
|  | Quadratic | -8.0566 | 1.7692 | -4.554 | < 0.0001 |
|  | Cubic | 0.7894 | 0.1672 | 4.722 | < 0.0001 |
| 2 | Intercept | 27.5963 | 1.1526 | 23.943 | < 0.0001 |
|  | Linear | -3.7213 | 0.7541 | -4.935 | < 0.0001 |
|  | Quadratic | 0.3597 | 0.1055 | 3.411 | 0.0007 |
|  | Cubic | / | / | / | / |
| 3 | Intercept | 83.5600 | 9.7053 | 8.610 | < 0.0001 |
|  | Linear | 32.9992 | 11.0583 | 2.984 | 0.0029 |
|  | Quadratic | -13.3529 | 3.5386 | -3.773 | 0.0002 |
|  | Cubic | 1.2408 | 0.3344 | 3.711 | 0.0002 |
| 4 | Intercept | 446.7061 | 8.3217 | 53.679 | < 0.0001 |
|  | Linear | -221.6863 | 9.4819 | -23.380 | < 0.0001 |
|  | Quadratic | 40.6575 | 3.0341 | 13.400 | < 0.0001 |
|  | Cubic | -2.4672 | 0.2867 | -8.605 | < 0.0001 |
| 5 | Intercept | 110.5850 | 18.2296 | 6.066 | < 0.0001 |
|  | Linear | 134.5833 | 20.7709 | 6.479 | < 0.0001 |
|  | Quadratic | -41.9766 | 6.6466 | -6.316 | < 0.0001 |
|  | Cubic | 3.3664 | 0.6281 | 5.360 | < 0.0001 |

**Abbreviations:** GBTM, group-based trajectory modeling; HBP, Heparin-binding protein; ARDS, acute respiratory distress syndrome

**Table S2** Internal validation of GBTM

| Group | *AvePP* (%) | *OCC* | *Pj* (%) | *πj* (%) |
| --- | --- | --- | --- | --- |
| 1 | 91.29 | 34.03 | 23.54 | 23.97 |
| 2 | 97.55 | 167.27 | 19.25 | 19.1 |
| 3 | 92.38 | 32.4 | 27.23 | 27.34 |
| 4 | 94.84 | 240.5 | 7.1 | 6.74 |
| 5 | 97.74 | 145.9 | 22.88 | 22.85 |

**Abbreviations:** GBTM, group-based trajectory modeling; AvePP, average posterior probability of assignment; OCC, odds of correct classification; *Pj*, posterior probabilities of group membership; *πj*, estimated prior probabilities

**Table S3** Daily HBP among five groups

| Time（day） | HBP（ng/mL） | | | | |
| --- | --- | --- | --- | --- | --- |
| traj1 | traj2 | traj3 | traj4 | traj5 |
| 1 | 21.85(14.75, 31.26) | 80.20(36.96, 160.51) | 279.18(230.21, 300.00) | 107.23(69.57, 147.00) | 210.72(123.47, 300.00) |
| 2 | 23.13(12.00, 28.62) | 81.44(36.17, 166.51) | 141.15 ± 50.53 | 110.23(73.97, 130.19) | 274.73(211.69, 300.00) |
| 3 | 20.81 (9.72, 29.32) | 73.45(33.64, 140.73) | 80.52 ± 32.74 | 95.11 (61.76, 131.15) | 230.59(159.12, 300.00) |
| 4 | 15.38(10.75, 21.02) | 58.80(26.38, 113.80) | 57.45 ± 34.68 | 76.34 (53.31, 104.59) | 179.27(131.59, 300.00) |
| 5 | 16.61 (9.03, 24.44) | 44.19(23.59, 88.96) | 42.59 ± 25.18 | 62.25(38.08, 93.99) | 137.95 (85.92, 214.84) |
| 6 | 16.87 (9.97, 23.89) | 42.13(23.82, 85.49) | 49.42 ± 34.98 | 52.02 (31.35, 98.16) | 101.83 (56.25, 188.35) |

**Abbreviations:** HBP, Heparin-binding protein.

**Notes:**traj1, stable at extremely low level; traj2, stable at low level; traj3, descending from a high level to a low level; traj4, stable at moderate level; traj5, stable at high level.
